# Supplementary material
Source: PubMed Central journal article supplement (PMC6884134)
Supplement: NIHMS1544133-supplement-1.pdf [file NIHMS1544133-supplement-1.pdf]

# **Bioengineered Adipose-Derived Stem Cells for Targeted Enzyme-Prodrug Therapy of Ovarian Cancer Intraperitoneal Metastasis**

Obeid M. Malekshah<sup>1</sup>, Siddik Sarkar<sup>1</sup>, Alireza Nomani<sup>1</sup>, Niket Patel<sup>1</sup>, Parisa Javidian<sup>2</sup>, Michael Goedken<sup>3</sup>, Marianne Polunas<sup>3</sup>, Pedro Louro<sup>3</sup>, and Arash Hatefi\*<sup>1,4</sup>

<sup>1</sup> Department of Pharmaceutics, Rutgers University, Piscataway, New Jersey 08854, USA

<sup>2</sup> Department of Pathology and Laboratory Medicine, Rutgers-Robert Wood Johnson Medical School, New Brunswick, New Jersey 08903, USA

<sup>3</sup> Rutgers Research Pathology Services, Rutgers University, Piscataway, 08854, New Jersey, USA

<sup>4</sup> Cancer Pharmacology Program, Rutgers-Cancer Institute of New Jersey, New Brunswick, New Jersey 08903, USA

## **Supporting Information**

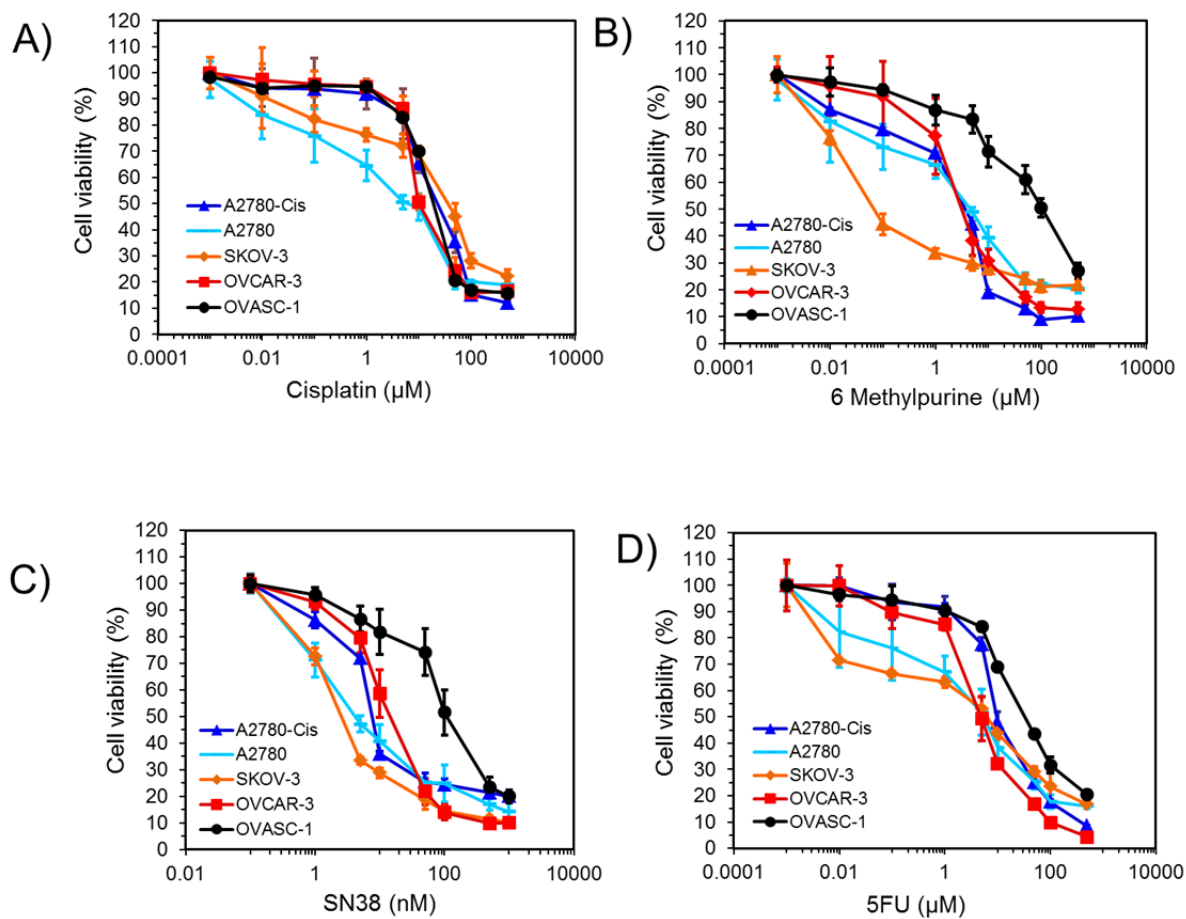

**Figure S1:** Evaluation of the cell viability by WST-1 cell toxicity assay. A-D) Ovarian cancer cells were exposed to different concentrations of the drugs and the viability of the cells was measured. The X-axis is plotted in Log scale. The data are reported as mean $\pm$ SD (n=4).

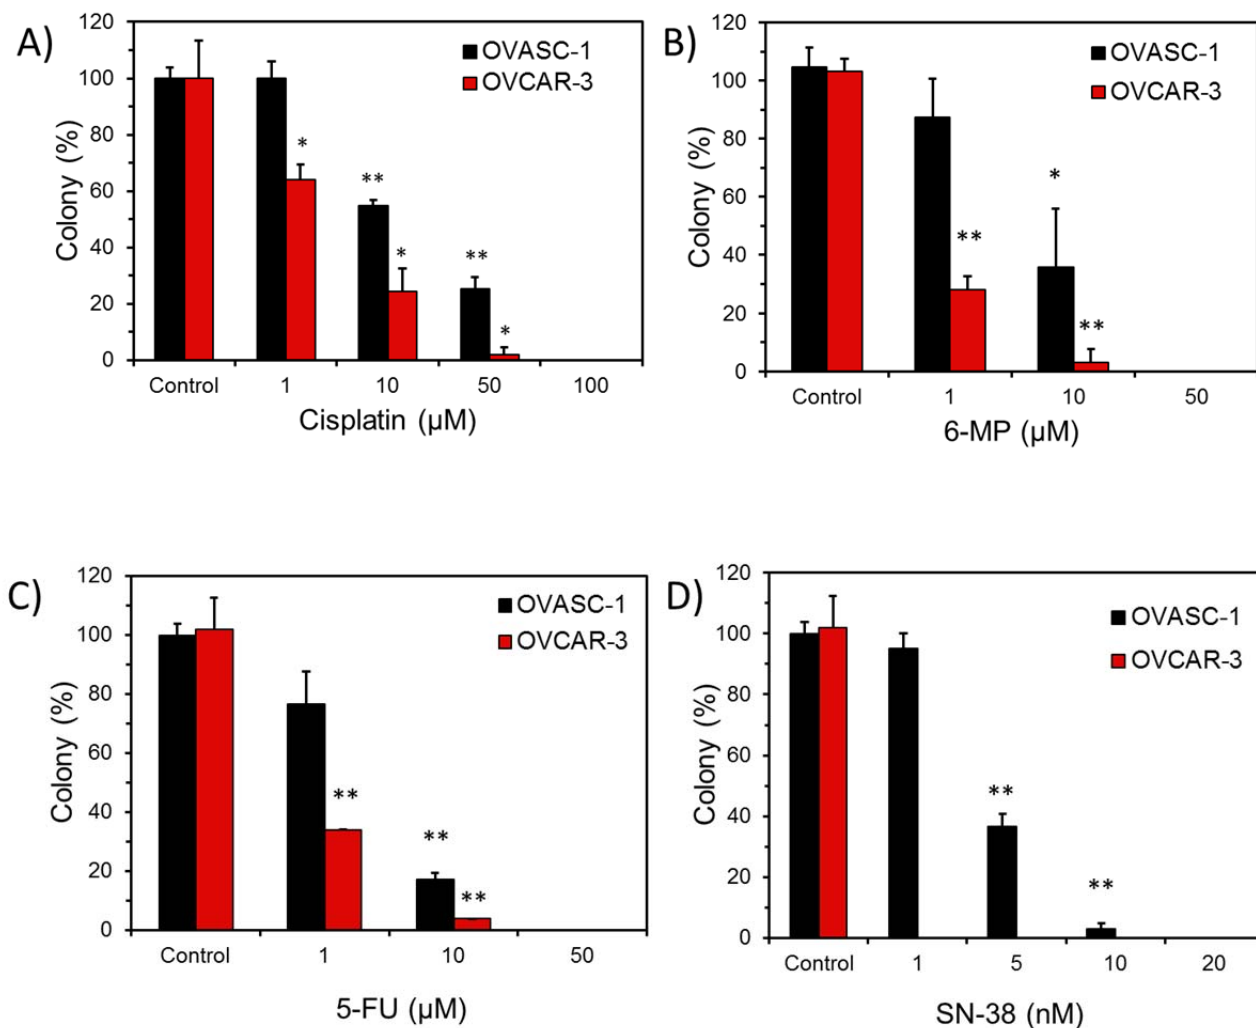

**Figure S2:** The measurement of drugs' chronic toxicities to OVASC-1 and OVCAR-3 cells by clonogenic assay. Ovarian cancer cells were exposed to different concentrations of the drugs and the number of colonies in each well was counted after 14 days. This figure shows that the OVASC-1 cells are the most drug-resistant cells and SN-38 is the most potent anticancer drug. The data are presented as mean $\pm$ SD (n=3). \*Statistical significance, t-test ( $p<0.05$ ).

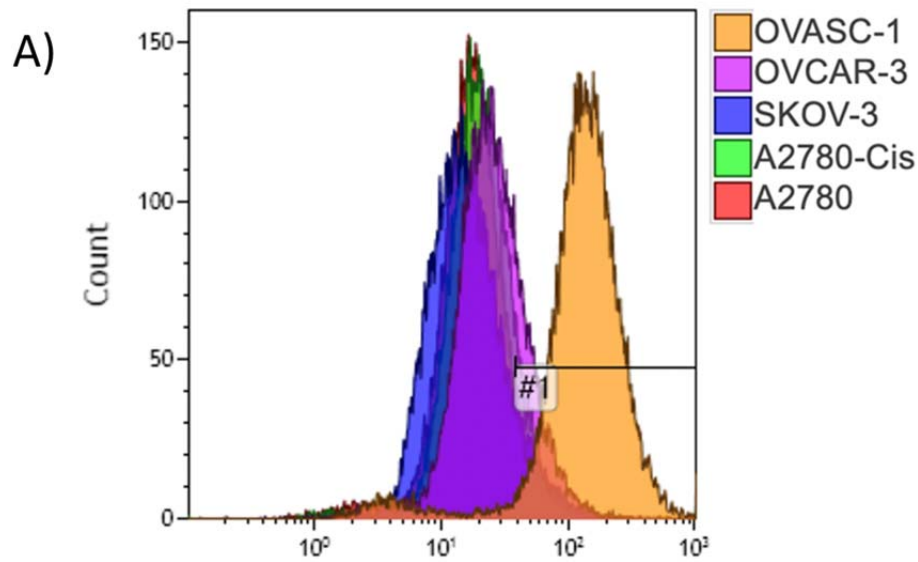

B)

0.95 Confidence interval  
(1/colony forming cells frequency)

| <u>Cell line</u> | <u>Lower</u> | <u>Estimate</u> | <u>Upper</u> |
|------------------|--------------|-----------------|--------------|
| OVASC-1          | 31.7         | 20.3            | 13.1         |
| OVCAR-3          | 49.4         | 31.7            | 20.3         |
| A2780-CIS        | 73.4         | 47              | 30.2         |
| SKOV-3           | 74.8         | 47.9            | 30.7         |
| A2780            | 108          | 69.2            | 44.3         |

**Figure S3:** A) Flow cytometry histograms of the ALDH<sup>+</sup> ovarian cancer cells. Cells were treated with ALDHFLUOR substrate and the intensity of the fluorescent signal was detected by flow cytometry. This figure shows that OVASC-1 cells have the highest population of ALDH<sup>+</sup> cells. B) Estimation of the frequency of CICs in different ovarian cancer cell populations (0.95 Confidence Interval) by limiting dilution assay using ELDA online software (<http://bioinf.wehi.edu.au/software/elda/index.html>).

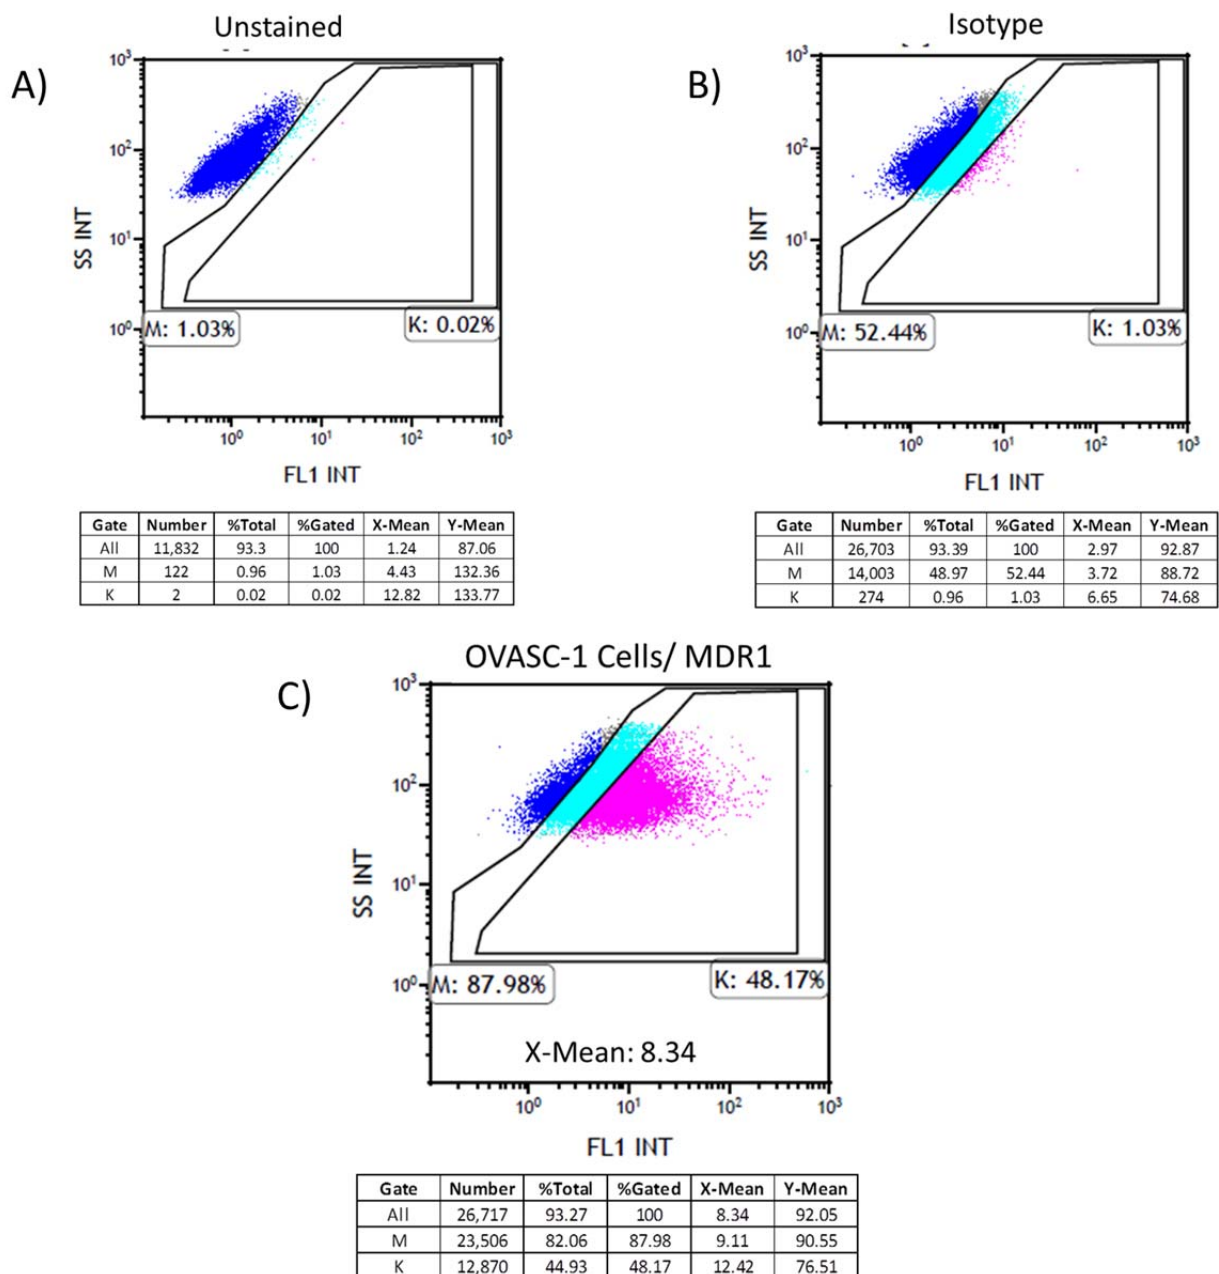

**Figure S4:** Evaluation of the expression of MDR1 transporters on the surface of OVASC-1 cells. A-B) Unstained OVASC-1 cells and cells labeled with fluorescent IgG1 isotype (controls). C) OVASC-1 cells were labeled with fluorescent anti-MDR1 primary antibody and analyzed by flow cytometry. X-mean (Mean Fluorescence Intensity) denotes the fold difference in between the expression of the transporter on the surface of OVASC-1 cells stained with the anti-MDR1 antibody and the IgG isotype control indicating the transporter density.

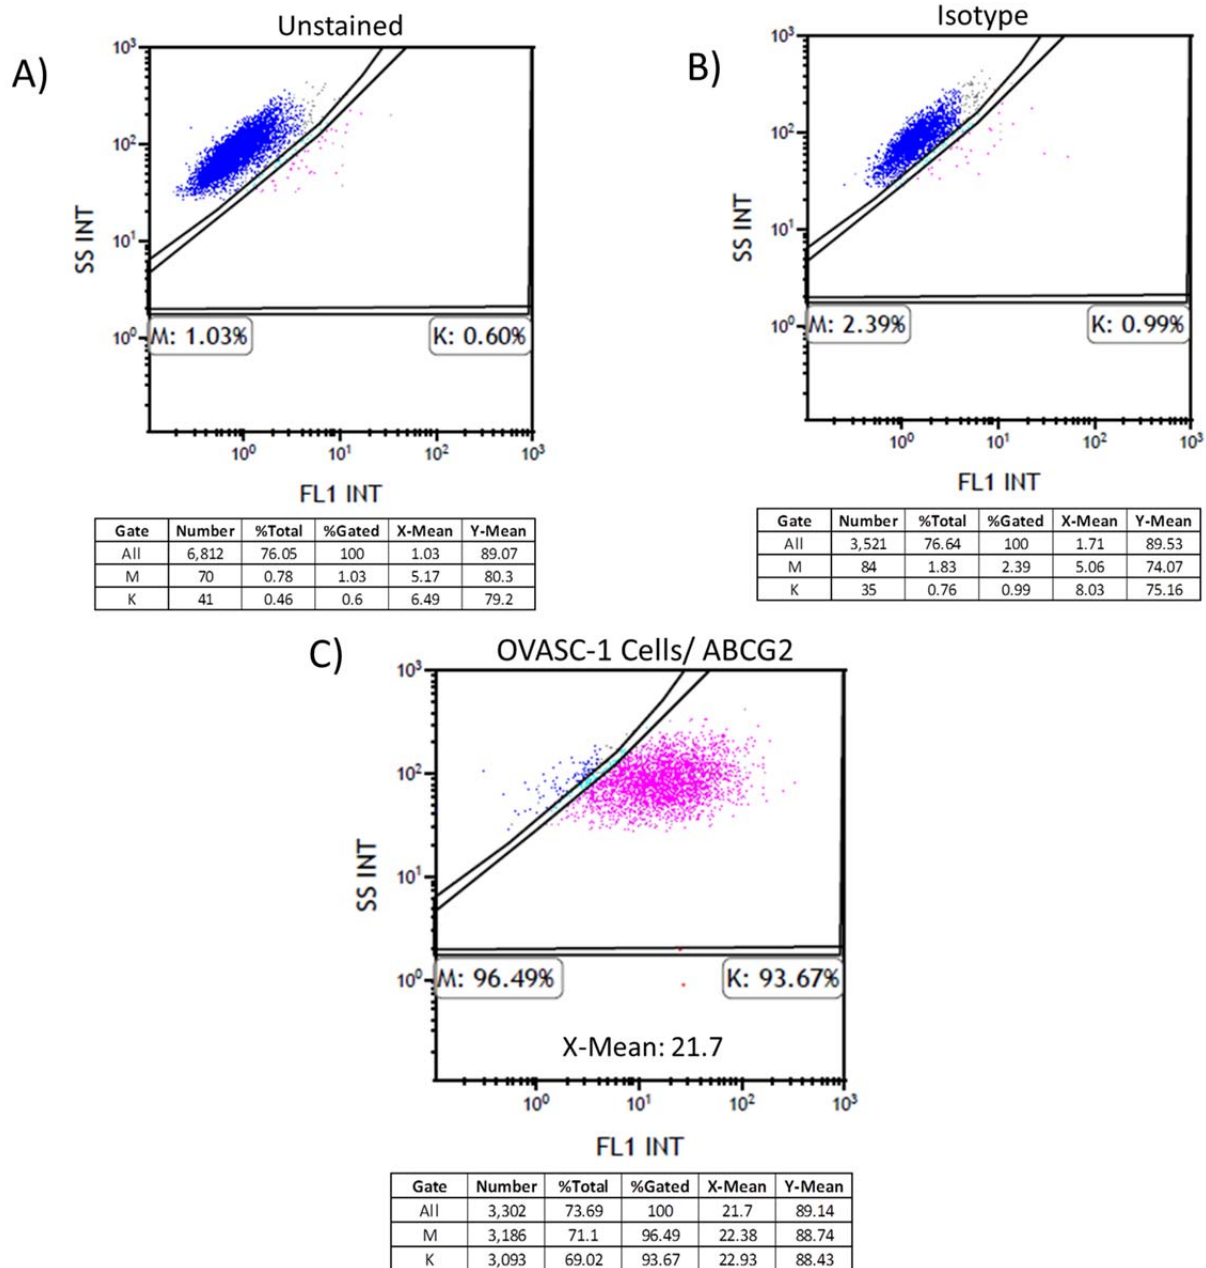

**Figure S5:** Evaluation of the expression of ABCG2 transporters on the surface of OVASC-1 cells. A-B) Unstained OVASC-1 cells and cells labeled with fluorescent IgG1 isotype were used as controls. C) OVASC-1 cells were labeled with fluorescent anti-ABCG2 primary antibody and analyzed by flow cytometry. X-mean (Mean Fluorescence Intensity) denotes the fold difference in between the expression of the transporter on the surface of OVASC-1 cells stained with the anti-ABCG2 antibody and the IgG isotype control indicating the transporter density.

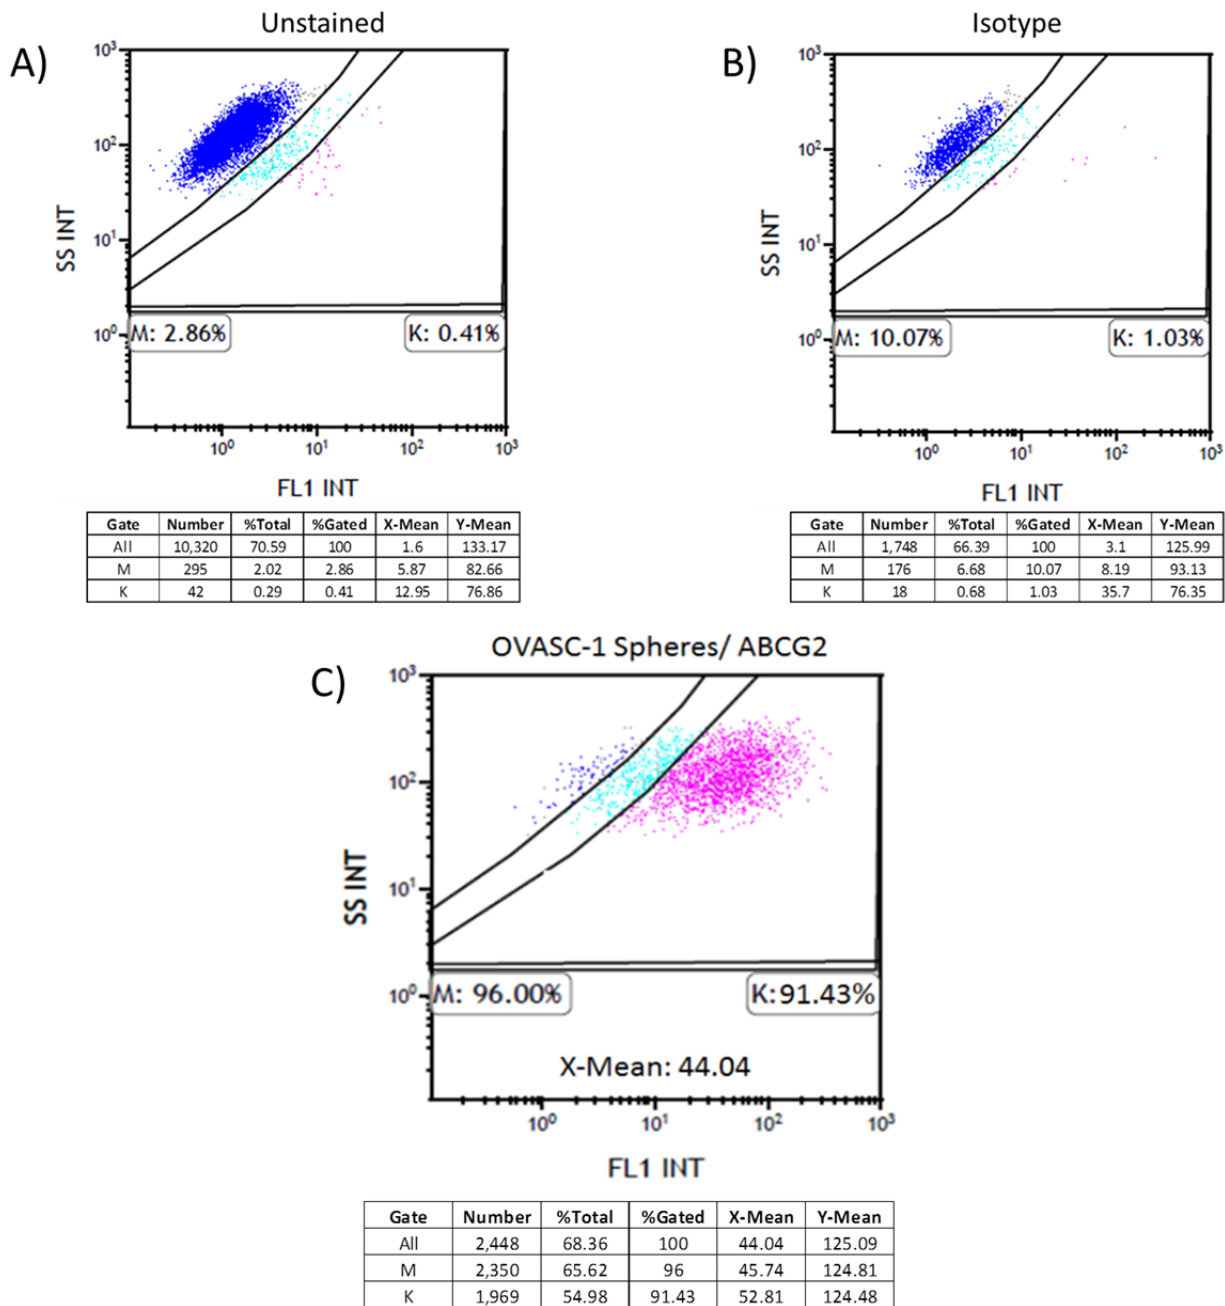

**Figure S6:** Evaluation of the expression of ABCG2 transporters on the surface of OVASC-1 cells in tumorspheres. A-B) Unstained OVASC-1 cells and cells labeled with fluorescent IgG1 isotype were used as controls. C) OVASC-1 cells from tumorspheres were labeled with fluorescent anti-ABCG2 primary antibody and analyzed by flow cytometry. X-mean (Mean Fluorescence Intensity) denotes the fold difference in between the expression of the transporter on the surface of OVASC-1 cells stained with the anti-ABCG2 antibody and the IgG isotype control indicating the transporter density.

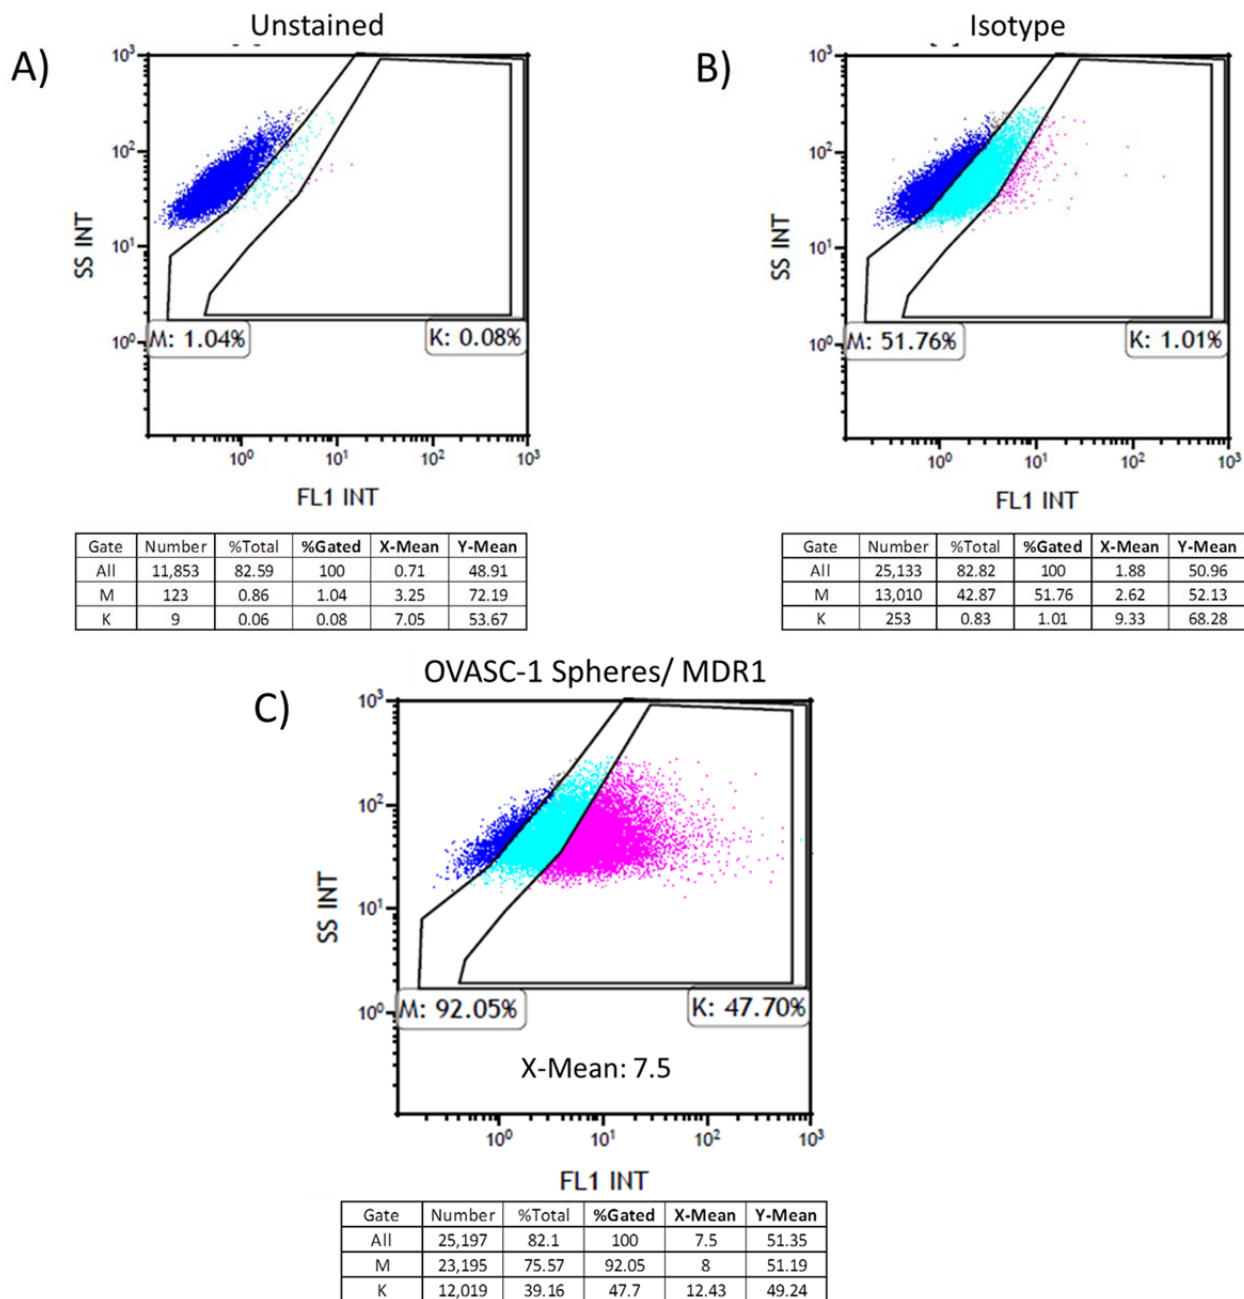

**Figure S7:** Evaluation of the expression of MDR1 transporters on the surface of OVASC-1 cells in tumorspheres. A-B) Unstained OVASC-1 cells and cells labeled with fluorescent IgG1 isotype were used as controls. C) OVASC-1 cells from tumorspheres were labeled with fluorescent anti-MDR1 primary antibody and analyzed by flow cytometry. X-mean (Mean Fluorescence Intensity) denotes the fold difference in expression of the transporter on the surface of OVASC-1 cells stained with the anti-MDR1 antibody in comparison to the IgG isotype control indicating the transporter density.

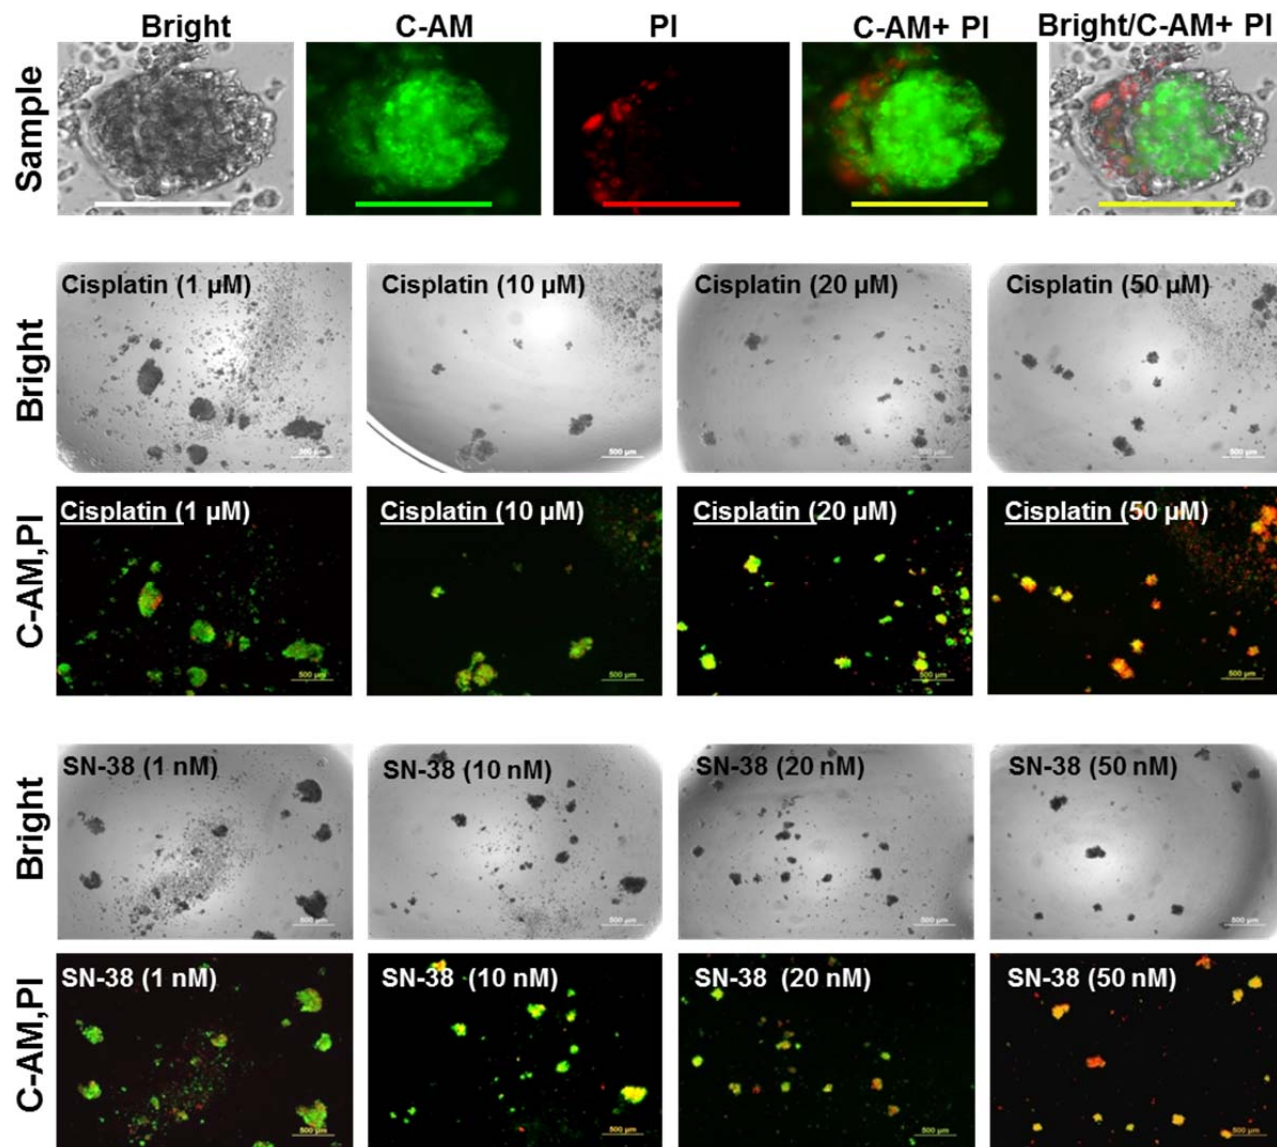

**Figure S8:** Evaluation of the OVASC-1 tumorspheres sensitivity to SN-38 and cisplatin. Tumorspheres were stained with the fluorophores calcein-AM (CAM) and propidium iodide (PI) to visualize live (green) and dead (red) cells, respectively. Scale bar= 500  $\mu$ m. This figure shows that the tumorspheres consisted of mostly live cells when exposed to SN-38 at less than 50 nM and cisplatin at less than 50  $\mu$ M.

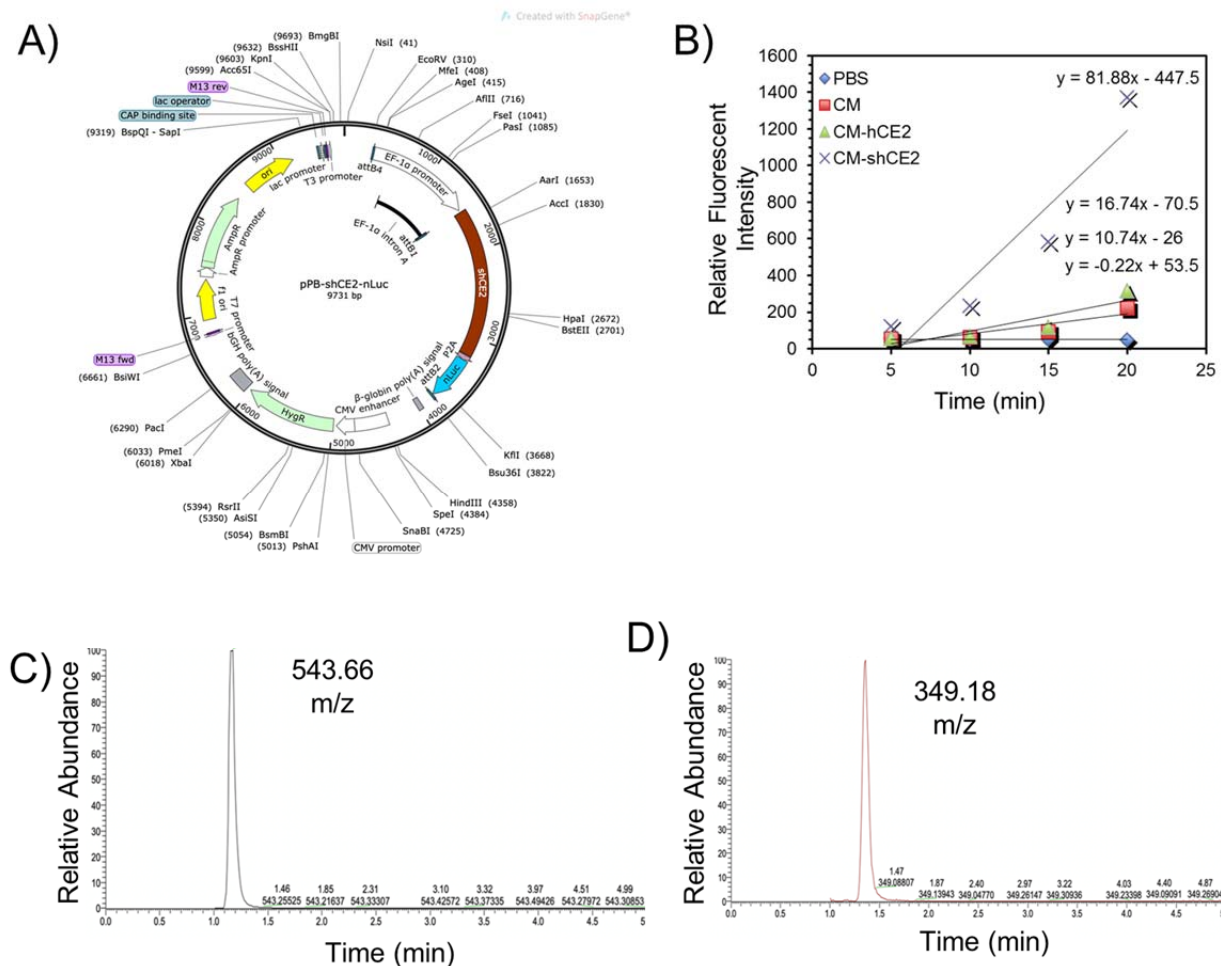

**Figure S9:** Genetic engineering and evaluation of the functionality of the genetically engineered ASC-shCE2:nLuc cells. A) The map of the plasmid DNA encoding shCE2 in fusion with nLuc. B) Measurement of the kinetics of FDA conversion over time. The ASC-shCE2:nLuc cells that secreted CE2 into the media could effectively convert FDA into its fluorescent byproduct (Y-axis). CM stands for culture media and PBS is phosphate buffer saline. CM-shCE2 stands for culture media from the ASC-shCE2:nLuc cells (secretory), whereas CM-hCE2 stands for culture media from the ASC-hCE2:nLuc cells (non-secretory). C) The mass spectroscopy chromatogram with major fragment ion of 543.66 m/z corresponding to irinotecan. D) The mass spectroscopy chromatogram with major fragment ion of 349.18 m/z corresponding to SN-38.

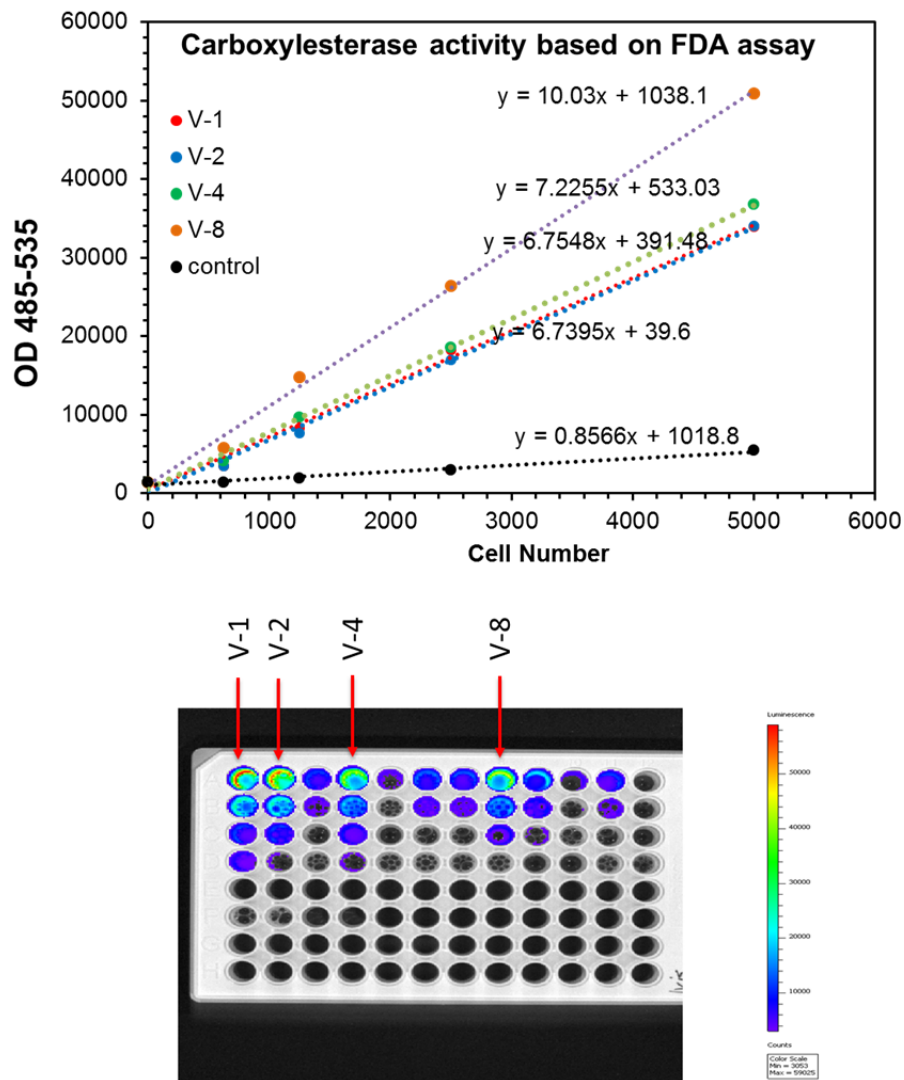

**Figure S10:** Selection of a clone of ASC-shCE2:nLuc cells that have high expression of both carboxylesterase and nanoluciferase genes. Top panel) FDA conversion assay that shows clone V8 had the highest carboxylesterase activity. Lower panel) nanoluciferase expression assay which shows clone V8 had significant luciferase expression levels (third highest). Considering the carboxylesterase expression as the priority, clone V8 was selected for the in vivo studies.

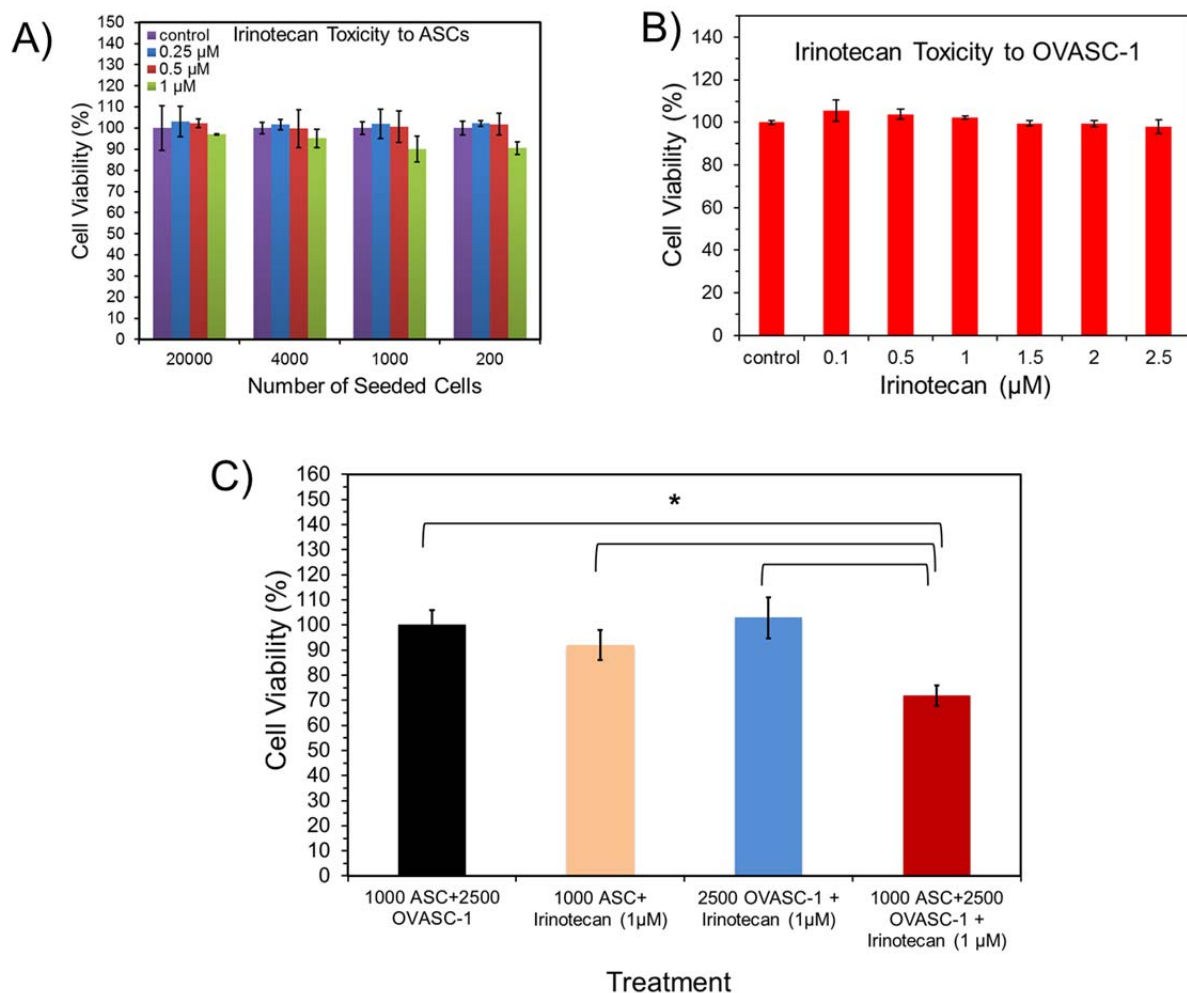

**Figure S11:** A) Evaluation of the viability of OVASC-1 cells treated with different concentrations of irinotecan. Irinotecan was not toxic to OVASC-1 cell up to 2.5  $\mu$ M. B) Evaluation of the viability of ASCs seeded at different numbers and treated with different concentrations of irinotecan. Irinotecan at 1 $\mu$ M concentration was not toxic to ASCs when at least 1000 cells were seeded. C) Evaluation of the cytotoxicity of the ASC-shCE2:nLuc cells in combination with CPT-11 to OVASC-1 cells. The absorbance of the 1000 ASCs co-cultured with 2500 OVASC-1 cells (without irinotecan) was considered as 100% viable. (\*ANOVA followed by a Post hoc Tukey test,  $p < 0.05$ )

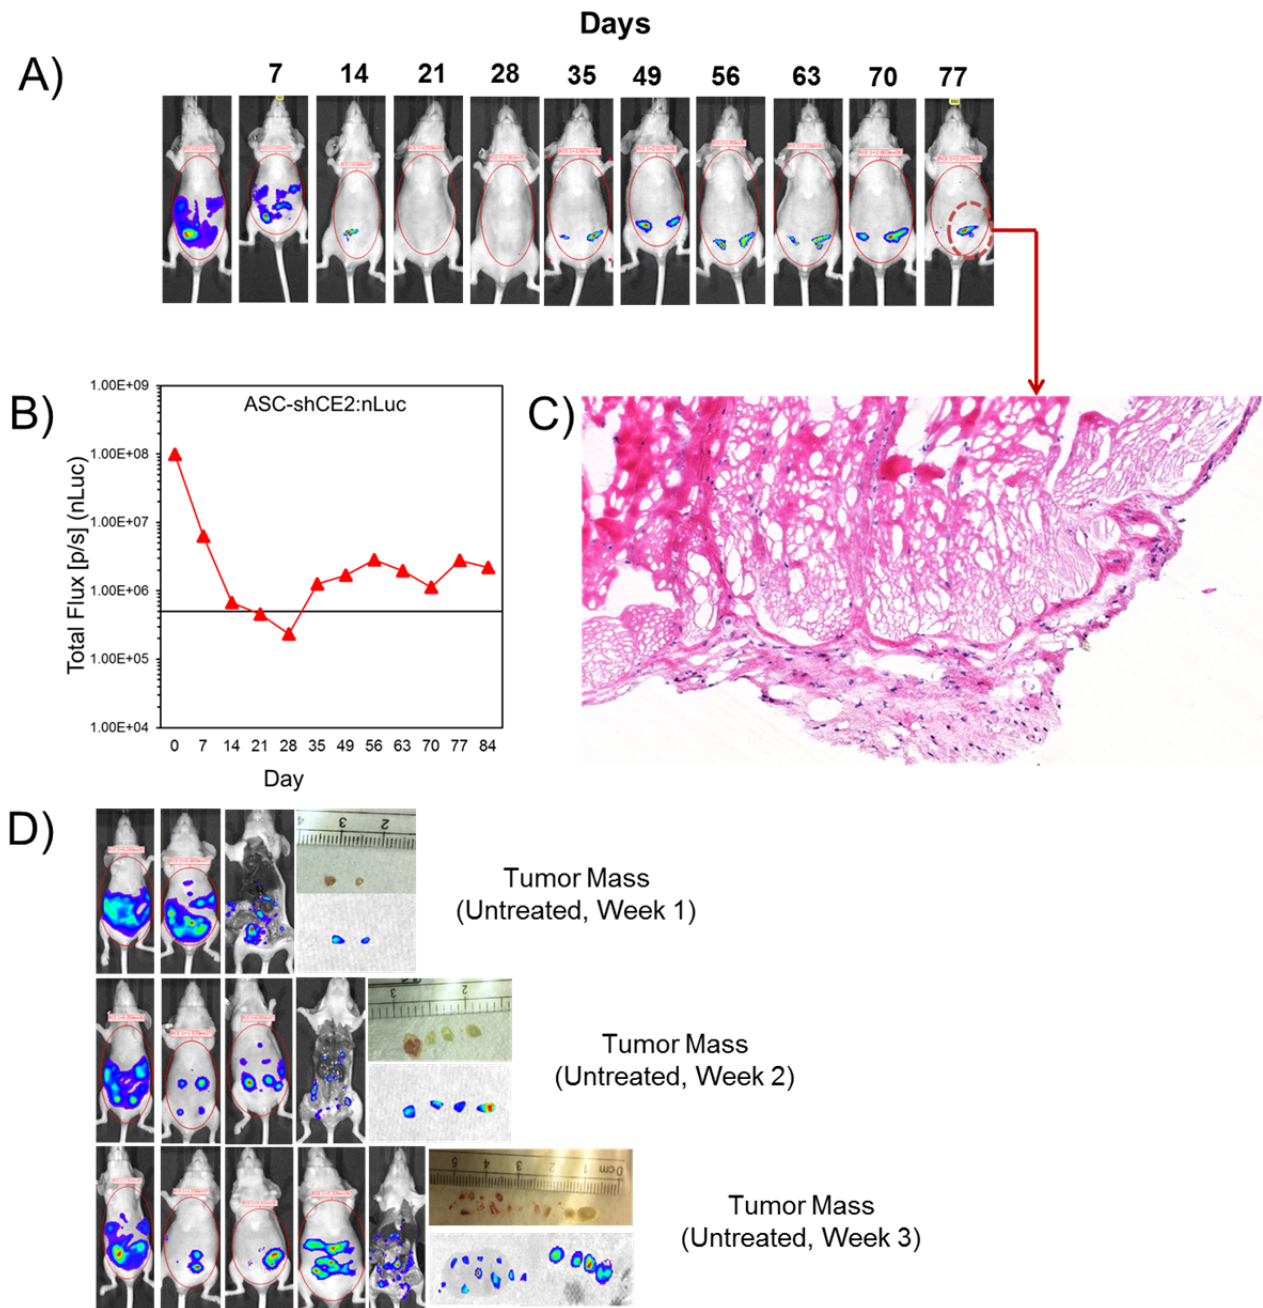

**Figure S12:** A) Bioluminescent imaging of the live mouse that was injected intraperitoneally with ASC-shCE2:nLuc cells. B) The bioluminescent signal intensity quantification over the 12 weeks period. C) Tissue section slide of the bioluminescent area showing the healthy mesentery and absence of malignancy. D) The growth of tumor mass inside mouse peritoneum over the course of three weeks. Mice were studied by BLI and then dissected to remove the tumors. The sizes of the tumors were measured and the numbers counted.

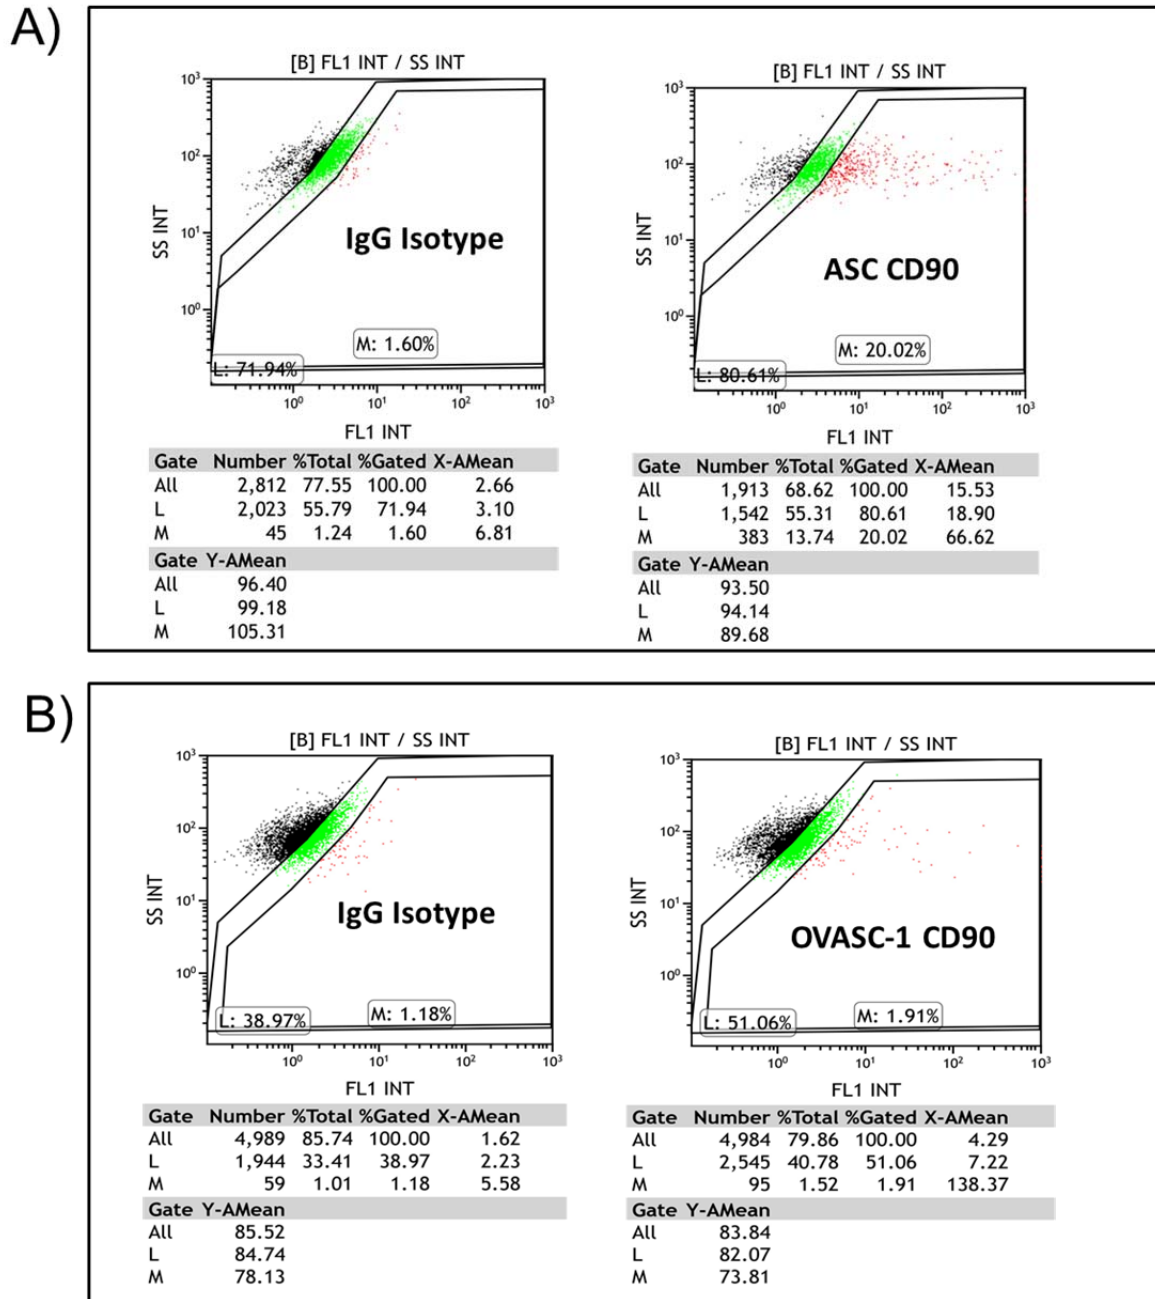

**Figure S13:** Evaluation of the expression of CD90 biomarker on the surfaces of ASC-shCE2:nLuc and OVASC-1 cells by flow cytometry. A) ASC-shCE2:nLuc cells labeled with fluorescent IgG1 isotype or anti-CD90 primary antibodies. B) OVASC-1 cells labeled with fluorescent IgG1 or anti-CD90 primary antibodies.

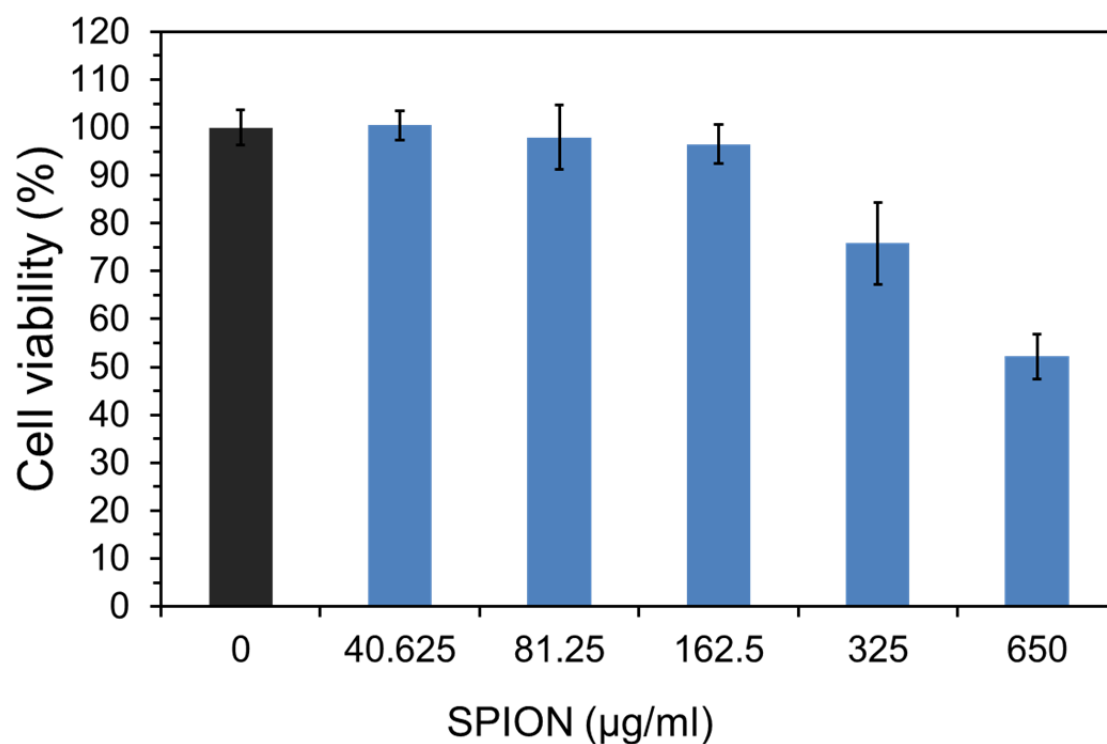

**Figure S14:** Evaluation of the toxicity of FluidMAG-D SPIONs to ASC-shCE2:nLuc cells. Cells were incubated with FluidMAG-D for 24 hours at different concentrations and the viability of the ASCs was measured by WST-1 cell toxicity assay. This figure shows that FluidMAG-D SPIONs are not toxic to ASCs at concentrations equal to or less than 162.5 µg/ml.

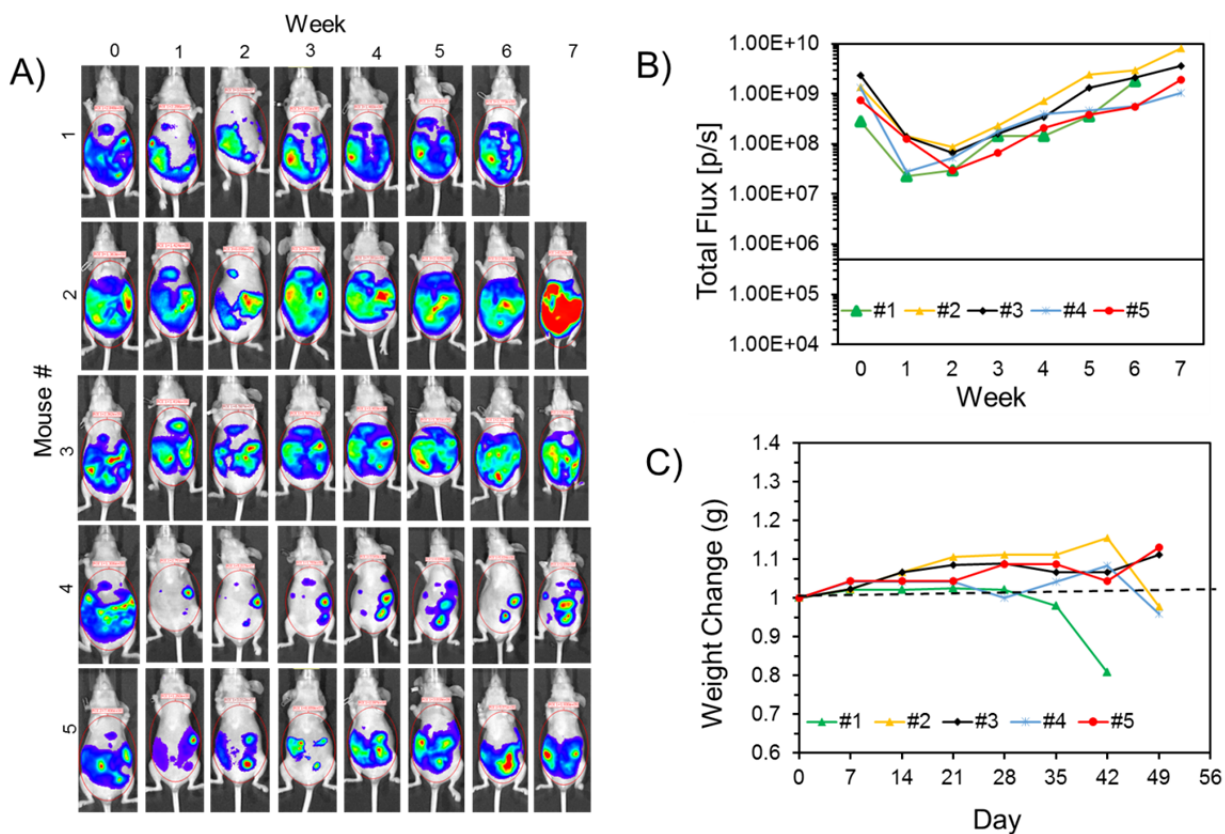

**Figure S15:** A) BLI of nude mice with intraperitoneal tumors (firefly luciferase imaging). B) The quantification of the bioluminescent signal over the period of seven weeks. The line at  $5 \times 10^5$  (p/s) shows the background bioluminescence of mice body without any tumors. C) Change in mice weight over the period of seven weeks. The weights of the mice before the treatment are normalized and considered as 1.

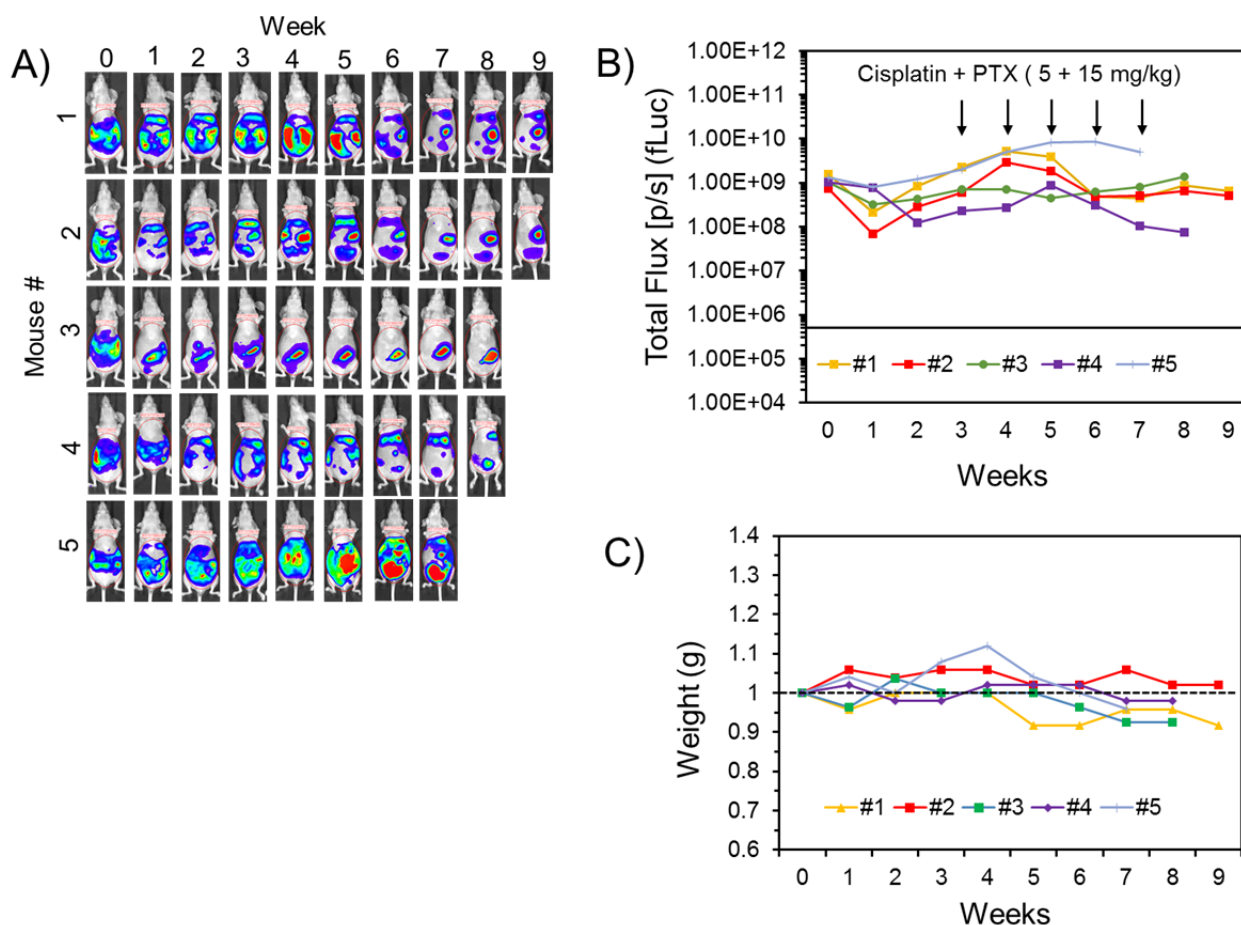

**Figure S16:** A) BLI of nude mice with intraperitoneal tumors (firefly luciferase imaging). B) The quantification of the bioluminescent signal over the treatment period with cisplatin and PTX. Arrows denote the points at which the mice received treatment. The line at  $5 \times 10^5$  (p/s) shows the background bioluminescence of mice body without any tumors. C) Change in mice weight over the period of nine weeks. The weights of the mice before the treatment are normalized and considered as 1.

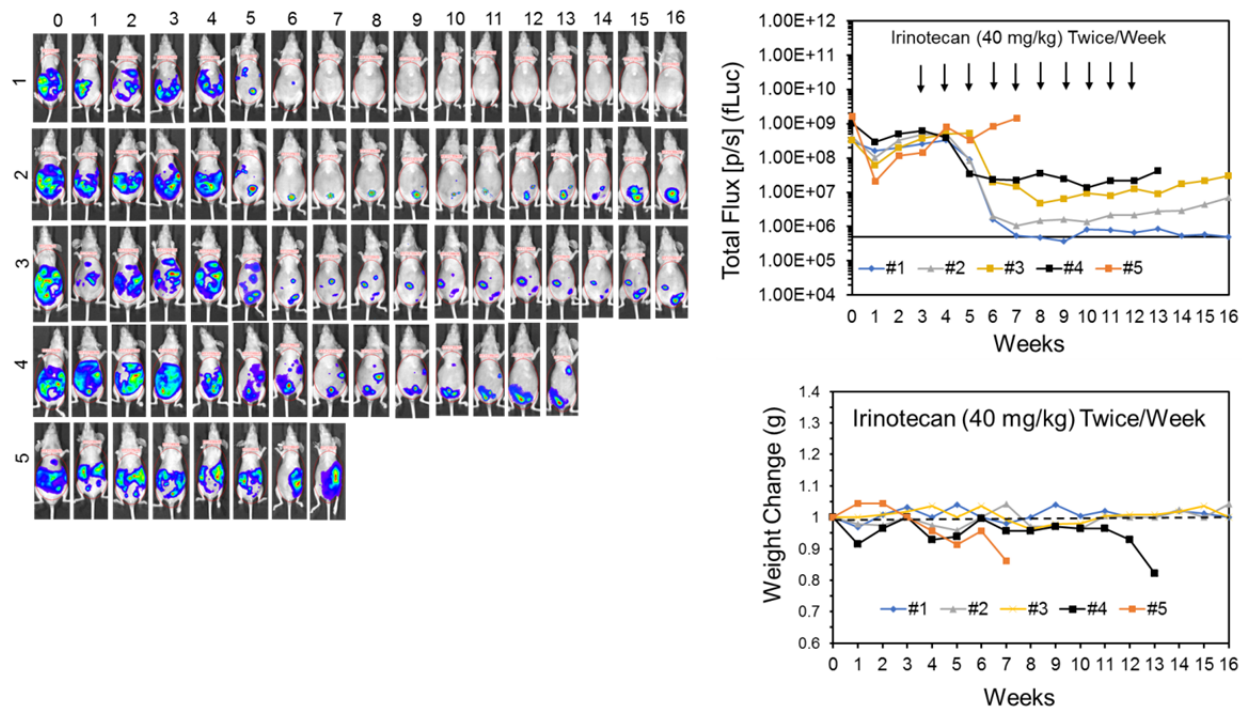

**Figure S17:** A) BLI of nude mice with intraperitoneal tumors (firefly luciferase imaging). B) The quantification of the bioluminescent signal over the treatment period with irinotecan (40 mg/kg). Arrows denote the points at which the mice received treatment. The line at  $5 \times 10^5$  (p/s) shows the background bioluminescence of mice body without any tumors. C) Change in mice weight over the treatment period. The weights of the mice before the treatment are normalized and considered as 1.

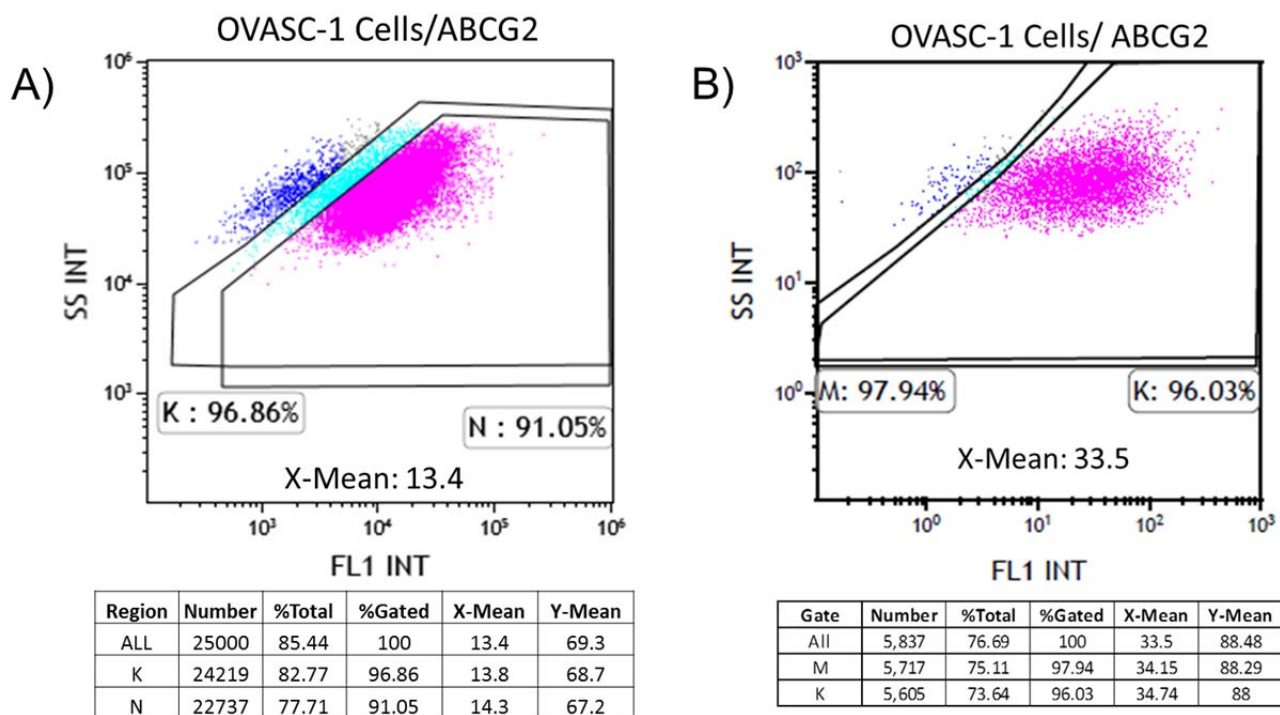

**Figure S18:** Evaluation of the expression of ABCG2 transporters on the surface of OVASC-1 cells. A) OVASC-1 cells grown in cell culture (in vitro) were labeled with fluorescent anti-ABCG2 primary antibody and analyzed by flow cytometry. X-mean (Mean Fluorescence Intensity) denotes the fold difference in expression of the transporter on the surface of OVASC-1 cells stained with the anti-ABCG2 antibody in comparison to the IgG isotype control indicating the transporter density. B) OVASC-1 cells were harvested from the tumor of the non-responsive mouse that was treated with irinotecan (40 mg/kg). Cells were propagated in vitro, labeled with fluorescent anti-ABCG2 primary antibody, and then analyzed by flow cytometry. X-mean denotes the fold difference in expression of the transporter on the surface of OVASC-1 cells stained with the anti-ABCG2 antibody in comparison to the IgG isotype control indicating the transporter density.

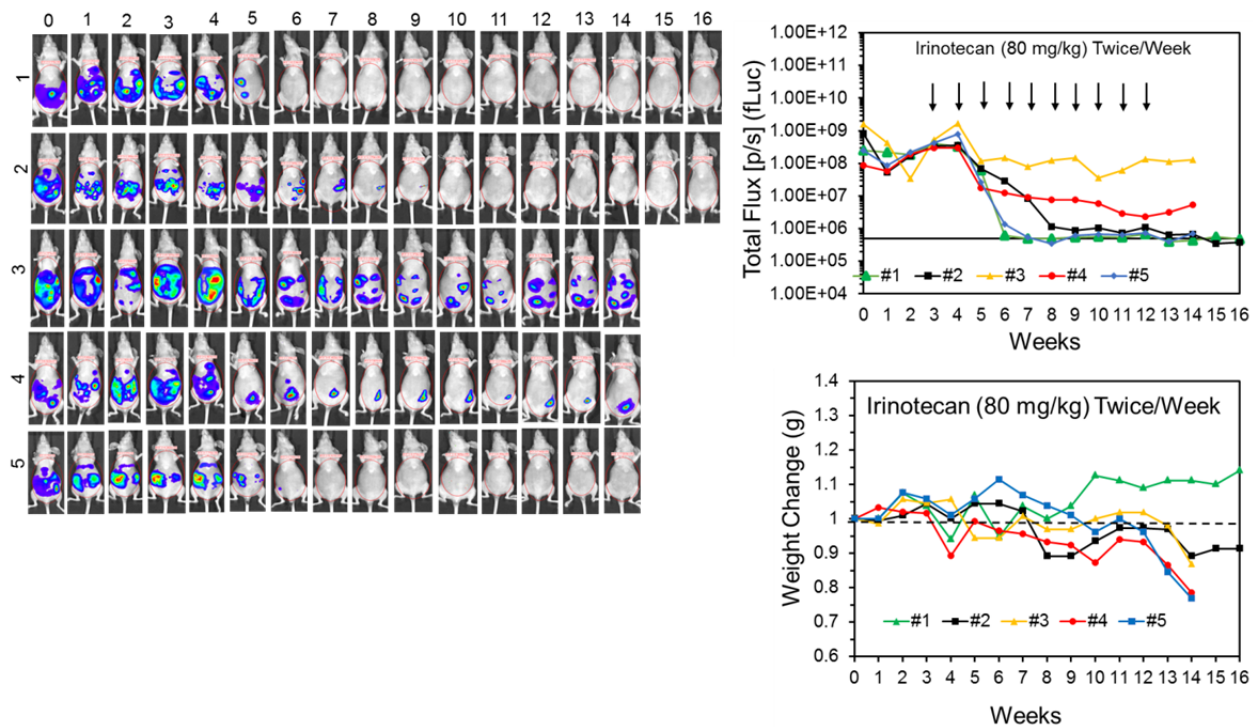

**Figure S19:** A) BLI of nude mice with intraperitoneal tumors (firefly luciferase imaging). B) The quantification of bioluminescent signal over the treatment period with irinotecan (80 mg/kg). Arrows denote the points at which the mice received treatment. The line at  $5 \times 10^5$  (p/s) shows the background bioluminescence of mice body without any tumors. C) Change in mice weight over the treatment period. The weights of the mice before the treatment are normalized and considered as 1.

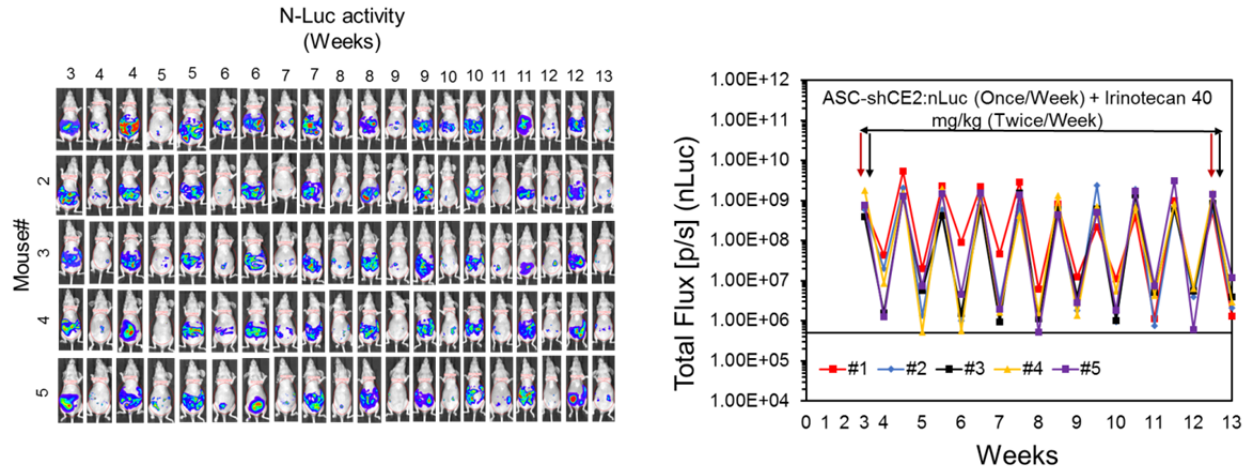

**Figure S20:** A) BLI of nude mice injected with ASC-shCE2:nLuc cells once a week for ten weeks and irinotecan (40 mg/kg) twice a week for ten weeks. B) The quantification of bioluminescent signal (nanoluciferase) from the ASC-shCE2:nLuc cells over the treatment period with irinotecan (40 mg/kg). Red arrow denotes the point at which the mice received cells and black arrow denotes the point at which the mice received irinotecan. The line at  $5 \times 10^5$  (p/s) shows the background bioluminescence of mice body without any tumors. The significant drop in bioluminescent signal intensity indicates the death of ASC-shCE2:nLuc cells after irinotecan injection.

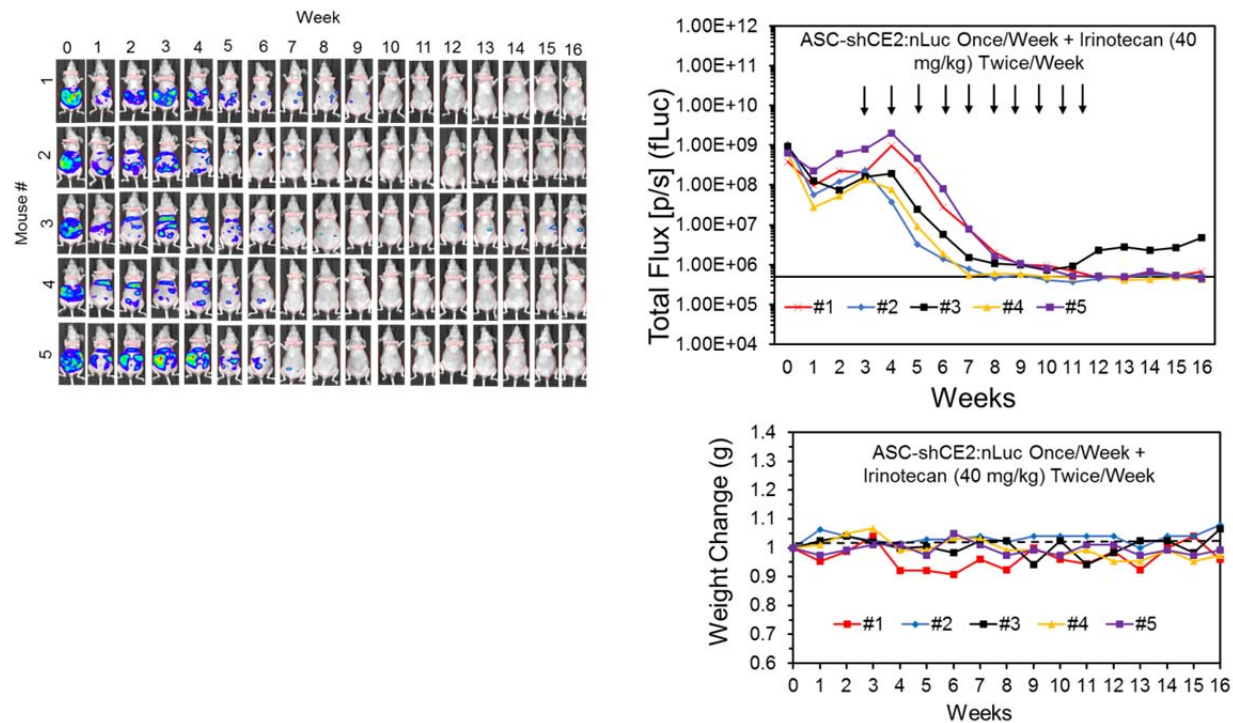

**Figure S21:** A) BLI of nude mice with intraperitoneal tumors (firefly luciferase imaging). B) The quantification of the bioluminescent signal over the treatment period with irinotecan (40 mg/kg). Arrows denote the points at which the mice received treatment. The line at  $5 \times 10^5$  (p/s) shows the background bioluminescence of mice body without any tumors. C) Change in mice weight over the treatment period. The weights of the mice before the treatment are normalized and considered as 1.

| Treatment                      | Mean (Weeks) |            |                         |             | Survival |
|--------------------------------|--------------|------------|-------------------------|-------------|----------|
|                                | Estimate     | Std. Error | 95% Confidence Interval |             | Percent  |
|                                |              |            | Lower Bound             | Upper Bound |          |
| Control, untreated             | 6.800        | .200       | 6.408                   | 7.192       | 0%       |
| Cisplatin + PTX (5 + 15 mg/kg) | 8.200        | .374       | 7.467                   | 8.933       | 0%       |
| Irinotecan (40 mg/kg)          | 14.000       | 1.720      | 10.628                  | 17.372      | 20%      |
| Irinotecan (80 mg/kg)          | 15.800       | .820       | 14.193                  | 17.407      | 40%      |
| ASC + Irinotecan (40 mg/kg)    | 17.600       | .358       | 16.899                  | 18.301      | 80%      |

**Figure S22:** Kaplan-Meier survival estimator data highlighting the increase in survival time and percent survival rate among the groups.

| Test  | Vehicle control | CPT-11 40 mg/kg | CPT-11 80 mg/kg | ASC-shCE2 +<br>CPT-11 (40 mg/kg) | Normal range  | Units               |
|-------|-----------------|-----------------|-----------------|----------------------------------|---------------|---------------------|
| WBC   | 2.37            | 5.82            | 3.2             | 5.29                             | 0.80 - 10.60  | 10 <sup>3</sup> /μL |
| NEU   | 0.42            | 1.17            | 0.52            | 1.59                             | 0.23 - 3.60   | 10 <sup>3</sup> /μL |
| LYM   | 1.80            | 3.51            | 2.03            | 2.47                             | 0.60 - 8.90   | 10 <sup>3</sup> /μL |
| MONO  | 0.12            | 0.95            | 0.31            | 0.57                             | 0.04 - 1.40   | 10 <sup>3</sup> /μL |
| EOS   | 0.03            | 0.13            | 0.29            | <b>0.52</b>                      | 0.00 - 0.51   | 10 <sup>3</sup> /μL |
| BAS   | 0.01            | 0.06            | 0.05            | 0.01                             | 0.00 - 0.12   | 10 <sup>3</sup> /μL |
| RBC   | 7.73            | 8.22            | 7.79            | 7.81                             | 6.50 - 11.50  | 10 <sup>6</sup> /μL |
| HGB   | 15.5            | 14.7            | 14.6            | 14.8                             | 11.00 - 16.50 | g/dL                |
| HCT   | 42.8            | 43.8            | 43              | 43.7                             | 35.00 - 55.00 | %                   |
| MCV   | <b>55.3</b>     | 53.3            | 55.2            | <b>55.65</b>                     | 41.00 - 55.00 | fL                  |
| MCH   | 19.3            | 17.9            | 18.7            | 18.65                            | 13.00 - 18.00 | pg                  |
| MCHC  | 35.1            | 33.5            | 33.9            | 33.7                             | 30.00 - 36.00 | g/dL                |
| RDW % | 12.05           | 13.7            | 14.1            | 12.85                            | 12.00 - 19.00 | %                   |
| PLT   | <b>356</b>      | 1347            | 778             | 533                              | 400 - 1600    | 10 <sup>3</sup> /μL |
| MPV   | 6.15            | 5.4             | 7.3             | 5.9                              | 4.00 - 6.2    | fL                  |

**Figure S23:** Analysis of blood factors in mice groups 1 to 5. No significant hematological toxicity was observed in mice of any group. Irinotecan (CPT-11).
